# Supplementary material
Source: PubMed Central journal article supplement (PMC6583095)
Supplement: jamaotolaryngolheadnecksurg-144-1153-s001.pdf [file jamaotolaryngolheadnecksurg-144-1153-s001.pdf]

## Supplementary Online Content

Rhee T-M, Hwang D, Lee J-S, Park J, Lee JM. Addition of hyperbaric oxygen therapy vs medical therapy alone for idiopathic sudden sensorineural hearing loss: a systematic review and meta-analysis. *JAMA Otolaryngol Head Neck Surg*. Published online September 27, 2018. doi:10.1001/jamaoto.2018.2133

**eMethods.** Supplementary Methods

**eTable 1.** Checklist of Items to Include When Reporting a Systematic Review or Meta-analysis (PRISMA Guidelines)

**eTable 2.** The Cochrane Collaboration's Tool for Assessing Risk of Bias of 3 Randomized Clinical Trials in Meta-analysis

**eTable 3.** The Newcastle-Ottawa Scale for Assessing the Quality of 16 Non-randomized Studies in Meta-analysis

**eTable 4.** Demographics of the Overall Population

**eFigure 1.** Funnel Plots for Evaluation of Publication Bias

**eFigure 2.** Effect of Additional Hyperbaric Oxygen Therapy on Absolute Hearing Gain

**eFigure 3.** Subgroup Analysis for Any Hearing Recovery

**eFigure 4.** Association Between Age and Hearing Recovery

**eFigure 5.** Association Between Sex and Hearing Recovery

### References

This supplementary material has been provided by the authors to give readers additional information about their work.

## eMethods. Supplementary Methods

### Search Strategy

| Pubmed*    |                                                              |              | EMBASE†    |                                                              |              | Cochrane Library |                                                              |             |
|------------|--------------------------------------------------------------|--------------|------------|--------------------------------------------------------------|--------------|------------------|--------------------------------------------------------------|-------------|
| <b>#18</b> | #11 and #17                                                  | <b>113</b>   | <b>#18</b> | #11 and #17                                                  | <b>138</b>   | <b>#19</b>       | Select ‘trials’ in #18                                       | <b>24</b>   |
| <b>#17</b> | #12 or #13 or #14 or #15 or<br>#16                           | <b>13417</b> | <b>#17</b> | #12 or #13 or #14 or #15 or<br>#16                           | <b>17570</b> | <b>#18</b>       | #11 and #17                                                  | <b>38</b>   |
| <b>#16</b> | ‘HBOT’                                                       | <b>576</b>   | <b>#16</b> | ‘HBOT’                                                       | <b>792</b>   | <b>#17</b>       | #12 or #13 or #14 or #15 or<br>#16                           | <b>2442</b> |
| <b>#15</b> | ‘HBO’                                                        | <b>2718</b>  | <b>#15</b> | ‘HBO’                                                        | <b>4107</b>  | <b>#16</b>       | ‘HBOT’                                                       | <b>125</b>  |
| <b>#14</b> | ‘hyperbaric oxygenation’                                     | <b>2361</b>  | <b>#14</b> | ‘hyperbaric oxygenation’                                     | <b>2672</b>  | <b>#15</b>       | ‘HBO’                                                        | <b>252</b>  |
| <b>#13</b> | ‘hyperbaric oxygen’                                          | <b>7094</b>  | <b>#13</b> | ‘hyperbaric oxygen’                                          | <b>9157</b>  | <b>#14</b>       | ‘hyperbaric oxygenation’                                     | <b>548</b>  |
| <b>#12</b> | ‘hyperbaric’                                                 | <b>12833</b> | <b>#12</b> | ‘hyperbaric’                                                 | <b>16222</b> | <b>#13</b>       | ‘hyperbaric oxygen’                                          | <b>1077</b> |
| <b>#11</b> | #1 or #2 or #3 or #4 or #5 or<br>#6 or #7 or #8 or #9 or #10 | <b>11020</b> | <b>#11</b> | #1 or #2 or #3 or #4 or #5 or<br>#6 or #7 or #8 or #9 or #10 | <b>13369</b> | <b>#12</b>       | ‘hyperbaric’                                                 | <b>2406</b> |
| <b>#10</b> | ‘ISHL’                                                       | <b>36</b>    | <b>#10</b> | ‘ISHL’                                                       | <b>43</b>    | <b>#11</b>       | #1 or #2 or #3 or #4 or #5 or<br>#6 or #7 or #8 or #9 or #10 | <b>811</b>  |

|    |                                     |       |    |                                     |       |     |                                     |     |
|----|-------------------------------------|-------|----|-------------------------------------|-------|-----|-------------------------------------|-----|
| #9 | 'ISNHL'                             | 4     | #9 | 'ISNHL'                             | 5     | #10 | 'ISHL'                              | 67  |
| #8 | 'SHL'                               | 344   | #8 | 'SHL'                               | 416   | #9  | 'ISNHL'                             | 1   |
| #7 | 'SNHL'                              | 1244  | #7 | 'SNHL'                              | 1535  | #8  | 'SHL'                               | 29  |
| #6 | 'sensorineural hearing loss'        | 10568 | #6 | 'sensorineural hearing loss'        | 12783 | #7  | 'SNHL'                              | 45  |
| #5 | 'ISSHL'                             | 106   | #5 | 'ISSHL'                             | 126   | #6  | 'sensorineural hearing loss'        | 718 |
| #4 | 'ISSNHL'                            | 136   | #4 | 'ISSNHL'                            | 149   | #5  | 'ISSHL'                             | 23  |
| #3 | 'SSHL'                              | 122   | #3 | 'SSHL'                              | 134   | #4  | 'ISSNHL'                            | 30  |
| #2 | 'SSNHL'                             | 279   | #2 | 'SSNHL'                             | 318   | #3  | 'SSHL'                              | 22  |
| #1 | 'sudden sensorineural hearing loss' | 1239  | #1 | 'sudden sensorineural hearing loss' | 1447  | #2  | 'SSNHL'                             | 32  |
|    |                                     |       |    |                                     |       | #1  | 'sudden sensorineural hearing loss' | 220 |

\* Search options were limited to title or abstract by using commands as shown: ([Title/Abstract])

† Search options were limited to title, keyword, or abstract by using commands as shown: ([Title/Keyword/Abstract] : "ti,ab,kw")

## Characteristics of the Excluded Studies

| No. | Title                                                                                                                                                        | First Author     | Journal                  | Main Reason for Exclusion                                                                                       |
|-----|--------------------------------------------------------------------------------------------------------------------------------------------------------------|------------------|--------------------------|-----------------------------------------------------------------------------------------------------------------|
| 1   | Sudden hypoacusis treated with hyperbaric oxygen therapy: A controlled study <sup>1</sup>                                                                    | Fattori et al.   | Ear Nose Throat, 2001    | The protocol and main point of the study is irrelevant. The control group used vasodilator instead of steroids. |
| 2   | Sudden sensorineural hearing loss: Our experience in diagnosis, treatment, and outcome <sup>2</sup>                                                          | Cadoni et al.    | J Otolaryngol, 2005      | Results were not available as a suitable form for meta-analysis.                                                |
| 3   | Comparison of simultaneous systemic steroid and hyperbaric oxygen treatment versus only steroid in idiopathic sudden sensorineural hearing loss <sup>3</sup> | Callioglu et al. | Int J Clin Exp Med, 2015 | Results were not available as a suitable form for meta-analysis.                                                |
| 4   | Hyperbaric oxygen therapy as salvage therapy for sudden sensorineural hearing loss <sup>4</sup>                                                              | Ajduk et al.     | J Int Adv Otol, 2017     | Results were not available as a suitable form for meta-analysis.                                                |

---

|   |                                                                                              |                 |                                   |   |                                                                                                                                               |
|---|----------------------------------------------------------------------------------------------|-----------------|-----------------------------------|---|-----------------------------------------------------------------------------------------------------------------------------------------------|
| 5 | The place of hyperbaric oxygen therapy and ozone therapy in sudden hearing loss <sup>5</sup> | Tasdoven et al. | Braz<br>Otorhinolaryngol,<br>2017 | J | The protocol and main point of the study is irrelevant. This study mainly investigated the efficacy of ozone therapy for sudden hearing loss. |
|---|----------------------------------------------------------------------------------------------|-----------------|-----------------------------------|---|-----------------------------------------------------------------------------------------------------------------------------------------------|

---

**eTable 1.** Checklist of items to include when reporting a systematic review or meta-analysis (PRISMA guidelines)

| Section/topic             |   | Checklist item                                                                                                                                                                                                                                                                                              | Reported on page # |
|---------------------------|---|-------------------------------------------------------------------------------------------------------------------------------------------------------------------------------------------------------------------------------------------------------------------------------------------------------------|--------------------|
| <b>TITLE</b>              |   |                                                                                                                                                                                                                                                                                                             |                    |
| Title                     | 1 | Identify the report as a systematic review, meta-analysis, or both.                                                                                                                                                                                                                                         | 1                  |
| <b>ABSTRACT</b>           |   |                                                                                                                                                                                                                                                                                                             |                    |
| Structured summary        | 2 | Provide a structured summary including, as applicable: background; objectives; data sources; study eligibility criteria, participants, and interventions; study appraisal and synthesis methods; results; limitations; conclusions and implications of key findings; systematic review registration number. | 3                  |
| <b>INTRODUCTION</b>       |   |                                                                                                                                                                                                                                                                                                             |                    |
| Rationale                 | 3 | Describe the rationale for the review in the context of what is already known.                                                                                                                                                                                                                              | 5                  |
| Objectives                | 4 | Provide an explicit statement of questions being addressed with reference to participants, interventions, comparisons, outcomes, and study design (PICOS).                                                                                                                                                  | 5                  |
| <b>METHODS</b>            |   |                                                                                                                                                                                                                                                                                                             |                    |
| Protocol and registration | 5 | Indicate if a review protocol exists, if and where it can be accessed (e.g., Web address), and, if available, provide registration information including registration number.                                                                                                                               | 8                  |
| Eligibility criteria      | 6 | Specify study characteristics (e.g., PICOS, length of follow-up) and report characteristics (e.g., years considered, language, publication status) used as criteria for eligibility, giving rationale.                                                                                                      | 6                  |
| Information sources       | 7 | Describe all information sources (e.g., databases with dates of coverage, contact with study authors to identify additional studies) in the search and date last searched.                                                                                                                                  | 6                  |

| Section/topic                      |    | Checklist item                                                                                                                                                                                                         | Reported on page #   |
|------------------------------------|----|------------------------------------------------------------------------------------------------------------------------------------------------------------------------------------------------------------------------|----------------------|
| Search                             | 8  | Present full electronic search strategy for at least one database, including any limits used, such that it could be repeated.                                                                                          | 6 and eMethods       |
| Study selection                    | 9  | State the process for selecting studies (i.e., screening, eligibility, included in systematic review, and, if applicable, included in the meta-analysis).                                                              | 6                    |
| Data collection process            | 10 | Describe method of data extraction from reports (e.g., piloted forms, independently, in duplicate) and any processes for obtaining and confirming data from investigators.                                             | 7                    |
| Data items                         | 11 | List and define all variables for which data were sought (e.g., PICOS, funding sources) and any assumptions and simplifications made.                                                                                  | 7                    |
| Risk of bias in individual studies | 12 | Describe methods used for assessing risk of bias of individual studies (including specification of whether this was done at the study or outcome level), and how this information is to be used in any data synthesis. | 7 and eMethods       |
| Summary measures                   | 13 | State the principal summary measures (e.g., risk ratio, difference in means).                                                                                                                                          | 8                    |
| Synthesis of results               | 14 | Describe the methods of handling data and combining results of studies, if done, including measures of consistency (e.g., $I^2$ ) for each meta-analysis.                                                              | 7-8                  |
| Risk of bias across studies        | 15 | Specify any assessment of risk of bias that may affect the cumulative evidence (e.g., publication bias, selective reporting within studies).                                                                           | 9 and eTable 2 and 3 |
| Additional analyses                | 16 | Describe methods of additional analyses (e.g., sensitivity or subgroup analyses, meta-regression), if done, indicating which were pre-specified.                                                                       | 7-8                  |
| <b>RESULTS</b>                     |    |                                                                                                                                                                                                                        |                      |

| Section/topic                 |    | Checklist item                                                                                                                                                                                               | Reported on page #             |
|-------------------------------|----|--------------------------------------------------------------------------------------------------------------------------------------------------------------------------------------------------------------|--------------------------------|
| Study selection               | 17 | Give numbers of studies screened, assessed for eligibility, and included in the review, with reasons for exclusions at each stage, ideally with a flow diagram.                                              | 8-9 and Figure 1               |
| Study characteristics         | 18 | For each study, present characteristics for which data were extracted (e.g., study size, PICOS, follow-up period) and provide the citations.                                                                 | 9 and Table 1                  |
| Risk of bias within studies   | 19 | Present data on risk of bias of each study and, if available, any outcome-level assessment (see Item 12).                                                                                                    | 9 and eTable 2 and 3           |
| Results of individual studies | 20 | For all outcomes considered (benefits or harms), present, for each study: (a) simple summary data for each intervention group and (b) effect estimates and confidence intervals, ideally with a forest plot. | 9-11                           |
| Synthesis of results          | 21 | Present results of each meta-analysis done, including confidence intervals and measures of consistency.                                                                                                      | 9-11, Figure 1-2               |
| Risk of bias across studies   | 22 | Present results of any assessment of risk of bias across studies (see Item 15).                                                                                                                              | 10, eFigure 1                  |
| Additional analysis           | 23 | Give results of additional analyses, if done (e.g., sensitivity or subgroup analyses, meta-regression [see Item 16]).                                                                                        | 10-11, Figure 3-4, eFigure 2-5 |
| <b>DISCUSSION</b>             |    |                                                                                                                                                                                                              |                                |
| Summary of evidence           | 24 | Summarize the main findings including the strength of evidence for each main outcome; consider their relevance to key groups (e.g., health care providers, users, and policy makers).                        | 11-13                          |
| Limitations                   | 25 | Discuss limitations at study and outcome level (e.g., risk of bias), and at review level (e.g., incomplete retrieval of identified research, reporting bias).                                                | 15-16                          |
| Conclusions                   | 26 | Provide a general interpretation of the results in the context of other evidence, and implications for future research.                                                                                      | 16                             |



| Section/topic  |    | Checklist item                                                                                                                             | Reported on page # |
|----------------|----|--------------------------------------------------------------------------------------------------------------------------------------------|--------------------|
| <b>FUNDING</b> |    |                                                                                                                                            |                    |
| Funding        | 27 | Describe sources of funding for the systematic review and other support (e.g., supply of data); role of funders for the systematic review. | N/A                |

**eTable 2.** The Cochrane Collaboration’s tool for assessing risk of bias of 3 randomized clinical trials in meta-analysis

| <b>Study</b>                              | <b>Domain</b>                          | <b>Support for judgment &amp; review authors’ judgment</b>                                                                                   |
|-------------------------------------------|----------------------------------------|----------------------------------------------------------------------------------------------------------------------------------------------|
| <b>Topuz et al. (2004)<sup>6</sup></b>    | Random sequence generation             | Unclear risk of bias. No indication of the method of random sequence generation.                                                             |
|                                           | Allocation concealment                 | Unclear risk of bias. No indication of an attempt at the allocation concealment.                                                             |
|                                           | Blinding of participants and personnel | High risk of bias. No attempt was described for blinding any party.                                                                          |
|                                           | Blinding of outcome assessment         | High risk of bias. No attempt was described for blinding of outcome assessment.                                                              |
|                                           | Incomplete outcome data                | Low risk of bias. All patients at each randomization group were completely followed, and 100% of each group received allocated intervention. |
|                                           | Selective reporting                    | Low risk of bias. All outcomes of interest have been reported in the manuscript.                                                             |
|                                           | Other sources of bias                  | Low risk of bias. The study appears to be free of other sources of bias.                                                                     |
| <b>Cekin et al. (2009)<sup>7</sup></b>    | Random sequence generation             | Low risk of bias. Patients were randomly allocated using a computer-based method.                                                            |
|                                           | Allocation concealment                 | Unclear risk of bias. No indication of an attempt at the allocation concealment.                                                             |
|                                           | Blinding of participants and personnel | High risk of bias. No attempt was described for blinding any party.                                                                          |
|                                           | Blinding of outcome assessment         | High risk of bias. No attempt was described for blinding of outcome assessment.                                                              |
|                                           | Incomplete outcome data                | Low risk of bias. All patients at each randomization group were completely followed, and 100% of each group received allocated intervention. |
|                                           | Selective reporting                    | Low risk of bias. All outcomes of interest have been reported in the manuscript.                                                             |
|                                           | Other sources of bias                  | Low risk of bias. The study appears to be free of other sources of bias.                                                                     |
| <b>Cvorovic et al. (2013)<sup>8</sup></b> | Random sequence generation             | Unclear risk of bias. No indication of the method of random sequence generation.                                                             |

---

|                                        |                                                                                                                                              |
|----------------------------------------|----------------------------------------------------------------------------------------------------------------------------------------------|
| Allocation concealment                 | Unclear risk of bias. No indication of an attempt at the allocation concealment.                                                             |
| Blinding of participants and personnel | High risk of bias. No attempt was described for blinding any party.                                                                          |
| Blinding of outcome assessment         | High risk of bias. No attempt was described for blinding of outcome assessment.                                                              |
| Incomplete outcome data                | Low risk of bias. All patients at each randomization group were completely followed, and 100% of each group received allocated intervention. |
| Selective reporting                    | Low risk of bias. All outcomes of interest have been reported in the manuscript.                                                             |
| Other sources of bias                  | Low risk of bias. The study appears to be free of other sources of bias.                                                                     |

---

**eTable 3.** The Newcastle-Ottawa Scale for assessing the quality of 16 non-randomized studies in meta-analysis

| No. | Author                          | Year | Selection | Comparability | Outcome |
|-----|---------------------------------|------|-----------|---------------|---------|
| 1   | Cavallazzi et al. <sup>9</sup>  | 1996 | ★★★★      | ★             | ★★      |
| 2   | Aslan et al. <sup>10</sup>      | 2002 | ★★★★      | ★             | ★★★     |
| 3   | Narozny et al. <sup>11</sup>    | 2004 | ★★★★      | ★             | ★★      |
| 4   | Desloovere et al. <sup>12</sup> | 2006 | ★★★★      | ★             | ★★★     |
| 5   | Satar et al. <sup>13</sup>      | 2006 | ★★★★      | ★             | ★★      |
| 6   | Dundar et al. <sup>14</sup>     | 2007 | ★★★★      | ★             | ★★      |
| 7   | Fujimura et al. <sup>15</sup>   | 2007 | ★★★★      | ★             | ★★★     |
| 8   | Ohno et al. <sup>16</sup>       | 2010 | ★★★★      | ★             | ★★★     |
| 9   | Alimoglu et al. <sup>17</sup>   | 2011 | ★★★★      | ★             | ★★      |
| 10  | Liu et al. <sup>18</sup>        | 2011 | ★★★★      | ★             | ★★★     |
| 11  | Yang et al. <sup>19</sup>       | 2013 | ★★★★      | ★             | ★★★     |
| 12  | Capuano et al. <sup>20</sup>    | 2015 | ★★★★      | ★             | ★★★     |
| 13  | Pezzoli et al. <sup>21</sup>    | 2015 | ★★★★      | ★             | ★★★     |
| 14  | Psillas et al. <sup>22</sup>    | 2015 | ★★★★      | ★             | ★★★     |
| 15  | Hosokawa et al. <sup>23</sup>   | 2017 | ★★★★      | ★             | ★★★     |

| <b>The Newcastle-Ottawa Scale</b>                                           |       |
|-----------------------------------------------------------------------------|-------|
| <b>Selection (Maximum of one star for each numbered item)</b>               |       |
| 1. Representativeness of the exposed cohort                                 |       |
| a) truly representative of the average _____ (describe) in the community *  |       |
| b) somewhat representative of the average _____ in the community *          |       |
| c) selected group of users eg nurses, volunteers                            |       |
| d) no description of the derivation of the cohort                           |       |
| 2. Selection of the non exposed cohort                                      |       |
| a) drawn from the same community as the exposed cohort *                    |       |
| b) drawn from a different source                                            |       |
| c) no description of the derivation of the non exposed cohort               |       |
| 3. Ascertainment of exposure to implants                                    |       |
| a) secure record (eg surgical records) *                                    |       |
| b) structured interview *                                                   |       |
| c) written self report                                                      |       |
| d) no description                                                           |       |
| 4. Demonstration that outcome of interest was not present at start of study |       |
| a) yes *                                                                    | b) no |



eTable 4. Demographics of the Overall Population

| Source                                  | Demographics of the Overall Population |         |                           |                                    |            |
|-----------------------------------------|----------------------------------------|---------|---------------------------|------------------------------------|------------|
|                                         | Mean Age, y                            | Male, % | Initial Hearing Level, dB | Severe to Profound Hearing Loss, % | Vertigo, % |
| Cavallazzi et al, <sup>22</sup> 1996    | 48.2                                   | 51.6    | NR                        | NR                                 | NR         |
| Aslan et al, <sup>23</sup> 2002         | 47.3                                   | 64.0    | NR                        | NR                                 | NR         |
| Narozny et al, <sup>9</sup> 2006        | 40.8                                   | 47.4    | 66.4                      | NR                                 | 34.6       |
| Topuz et al, <sup>6</sup> 2004          | 41.5                                   | 60.0    | 70.4                      | 25.5                               | NR         |
| Desloovere et al, <sup>10</sup> 2006    | 45.6                                   | 46.5    | 43.6                      | NR                                 | NR         |
| Satar et al, <sup>11</sup> 2006         | 45.5                                   | 66.7    | 72.5                      | 37.0                               | NR         |
| Dundar et al, <sup>12</sup> 2007        | NR                                     | 56.3    | NR                        | 80.0                               | NR         |
| Fujimura et al, <sup>13</sup> 2007      | 52.6                                   | NR      | 68.9                      | 27.7                               | 16.2       |
| Cekin et al, <sup>7</sup> 2009          | 46.0                                   | 64.9    | 86.8                      | NR                                 | 7.0        |
| Ohno et al, <sup>14</sup> 2010          | 49.0                                   | 50.0    | 60.7                      | 40.2                               | 32.6       |
| Alimoglu et al, <sup>15</sup> 2011      | NR                                     | NR      | 67.8                      | NR                                 | NR         |
| Liu et al, <sup>16</sup> 2011           | 45.8                                   | 48.4    | NR                        | 54.8                               | NR         |
| Cvorovic et al, <sup>8</sup> 2013       | 50.5                                   | NR      | 69.0                      | NR                                 | NR         |
| Yang et al, <sup>17</sup> 2013          | 51.1                                   | 46.9    | 86.2                      | NR                                 | 30.6       |
| Capuano et al, <sup>18</sup> 2015       | 53.6                                   | 57.0    | 69.6                      | 41.0                               | 8.0        |
| Pezzoli et al, <sup>19</sup> 2015       | 50.7                                   | NR      | 66.9                      | 38.6                               | NR         |
| Psillas et al, <sup>20</sup> 2015       | 49.1                                   | 42.2    | 69.8                      | 60.0                               | 24.4       |
| Hosokawa et al, <sup>21</sup> 2017      | 62.0                                   | 52.9    | NR                        | 30.0                               | 42.8       |
| Ricciardiello et al, <sup>24</sup> 2017 | 46.1                                   | 55.6    | 53.8                      | NR                                 | 24.1       |

Abbreviation: NR, not reported.

## eFigure 1. Funnel Plots for Evaluation of Publication Bias

### A. Complete hearing recovery

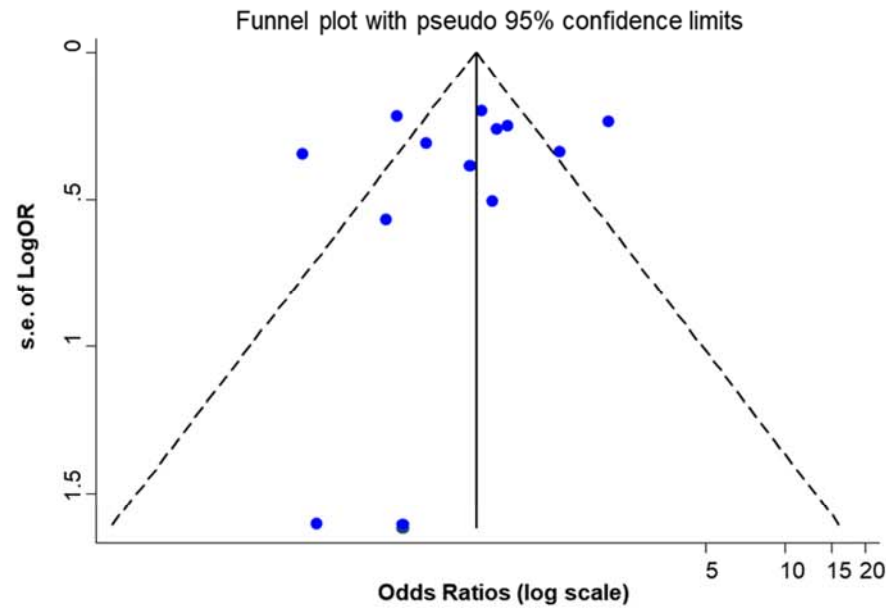

Egger's test  $P = 0.484$ , Begg's test  $P = 0.661$   
No Trimming Performed due to Absence of Asymmetry

### B. Any hearing recovery

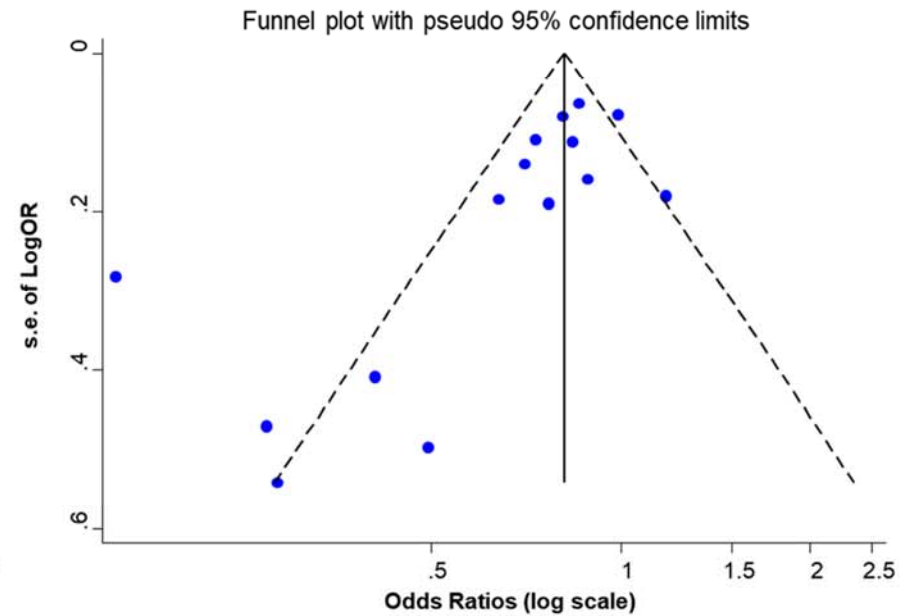

Egger's test  $P = 0.090$ , Begg's test  $P = 0.276$   
No Trimming Performed due to Absence of Asymmetry

## eFigure 1. Funnel plots for evaluation of publication bias

The results of Egger's and Begg's tests are presented. Using the trim-and-fill method, no trimming was done due to absence of asymmetry for funnel plots of (A) complete hearing recovery and (B) any hearing recovery.

Abbreviations: OR, odds ratio.

**eFigure 2. Effect of Additional Hyperbaric Oxygen Therapy on Absolute Hearing Gain**

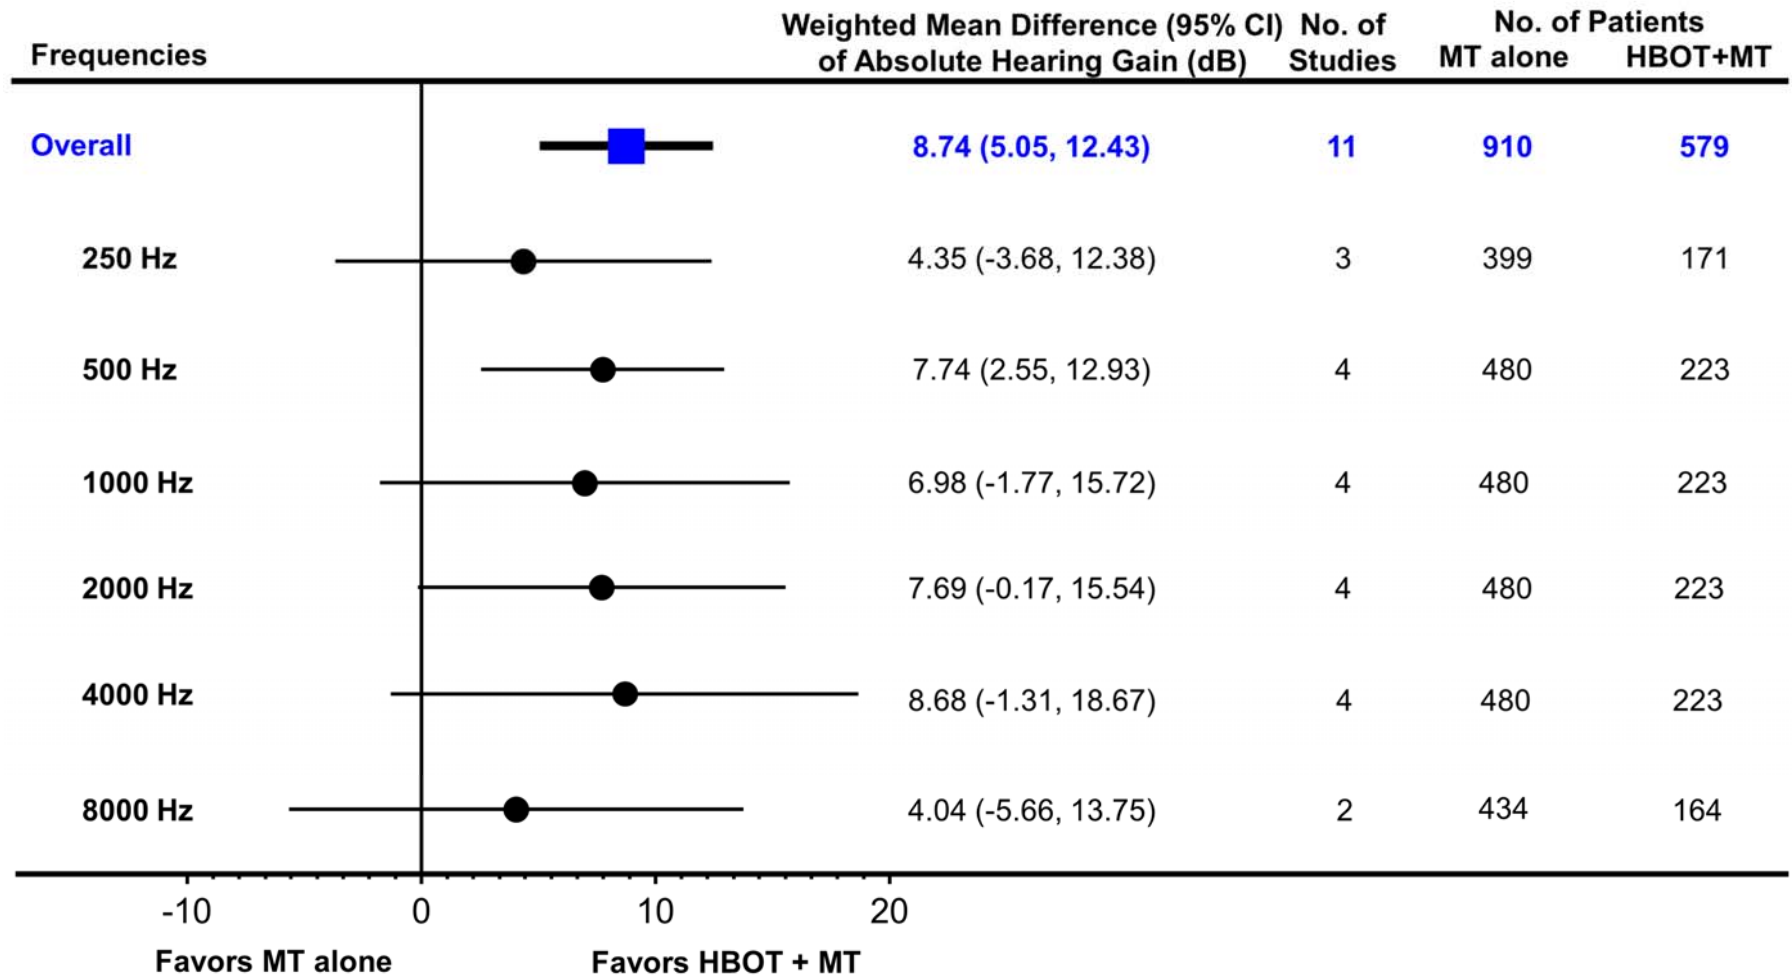

**eFigure 2. Effect of additional hyperbaric oxygen therapy on absolute hearing gain**

Mean difference with 95% confidence intervals of absolute hearing gain is displayed according to the frequency levels.



Abbreviations are as in Figure 2.

**eFigure 3. Subgroup Analysis for Any Hearing Recovery**

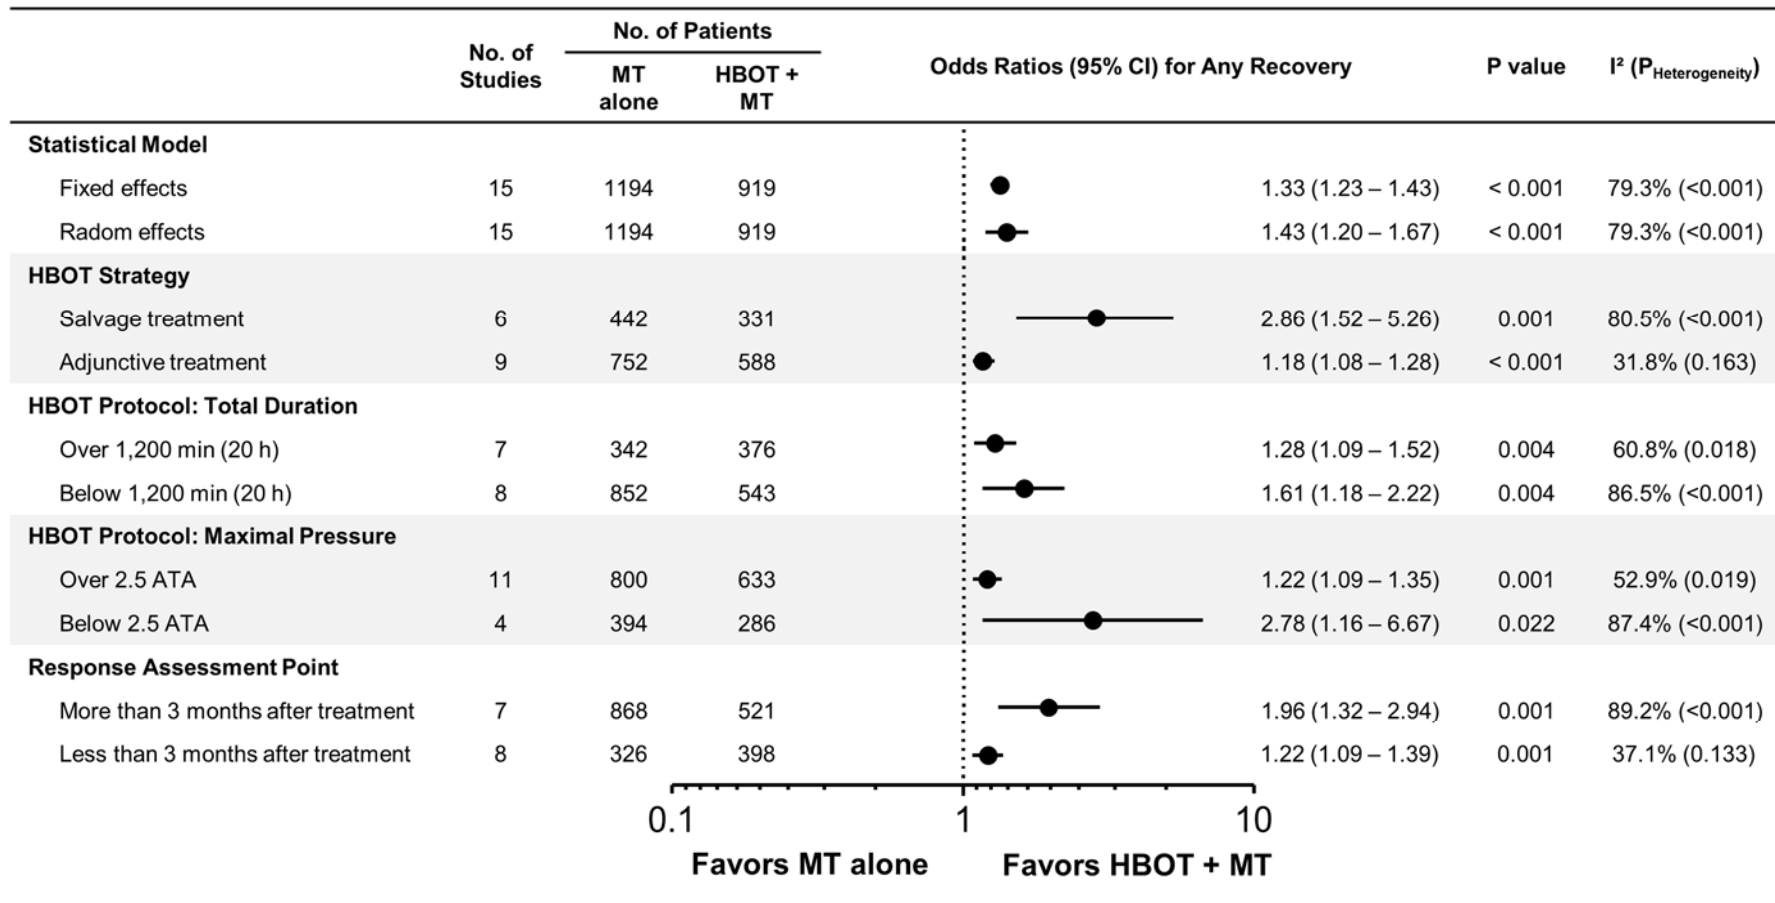

**eFigure 3. Subgroup analysis for any hearing recovery**

Effect of hyperbaric oxygen therapy on any hearing recovery according to the various subgroups is presented.

Abbreviations are as in Figure 5.

### eFigure 4. Association between Age and Hearing Recovery

#### A. Complete hearing recovery

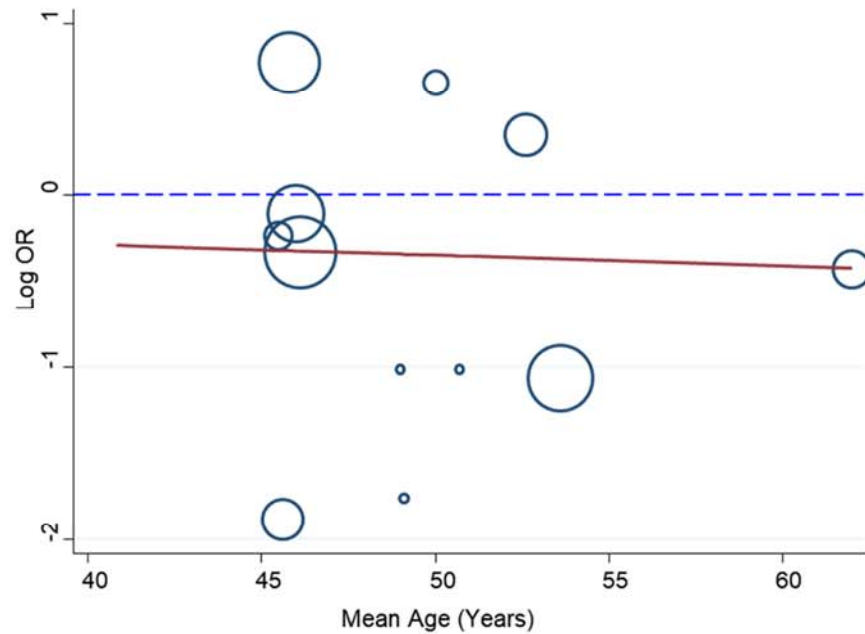

**$I^2$  residual = 83.05%, Adjusted  $R^2$  = -14.49%**  
**Odds Ratio 0.994, 95% CI (0.880 – 1.123), P = 0.913**

#### B. Any hearing recovery

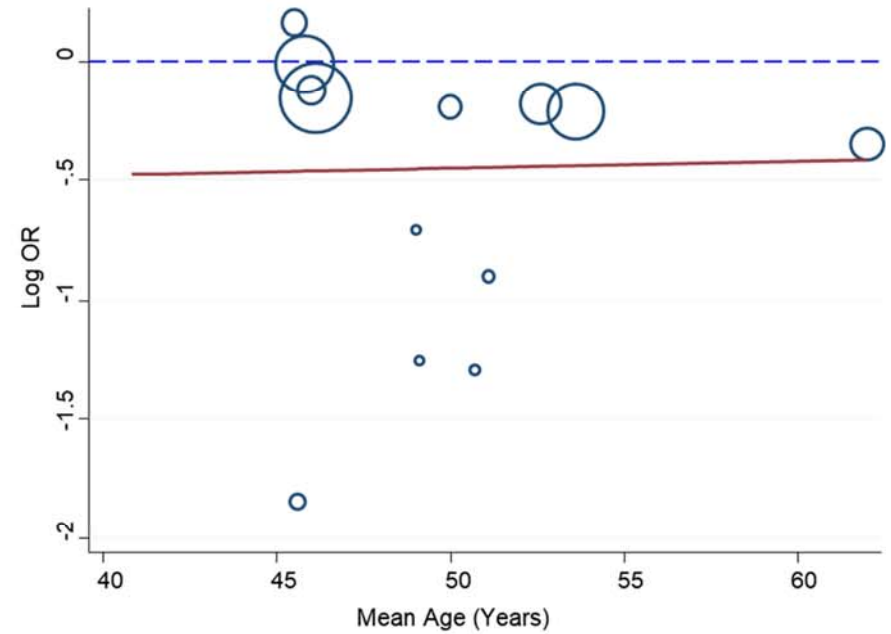

**$I^2$  residual = 80.25%, Adjusted  $R^2$  = -15.91%**  
**Odds Ratio 1.003, 95% CI (0.927 – 1.085), P = 0.939**

### eFigure 4. Association between age and hearing recovery

Log values of odds ratios for (A) complete hearing recovery and (B) any hearing recovery are plotted according to the mean age of each enrolled study, using random-effects meta-regression. Each circle indicates a trial which was proportionately weighed in meta-analysis.

Abbreviations: CI, confidence interval.

### eFigure 5. Association between Sex and Hearing Recovery

#### A. Complete hearing recovery

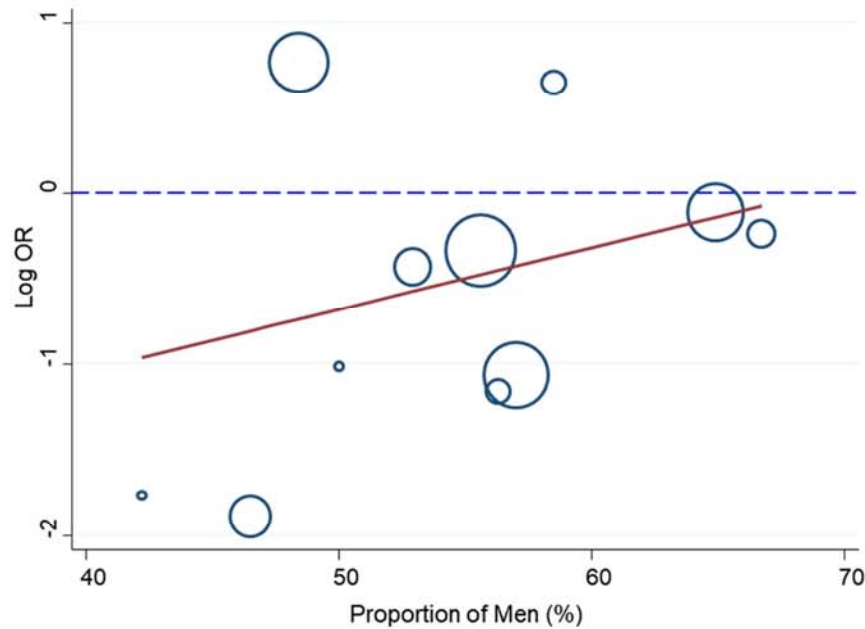

**$I^2$  residual = 84.96%, Adjusted  $R^2$  = -9.31%**  
**Odds Ratio 1.037, 95% CI (0.942 – 1.143), P = 0.415**

#### B. Any hearing recovery

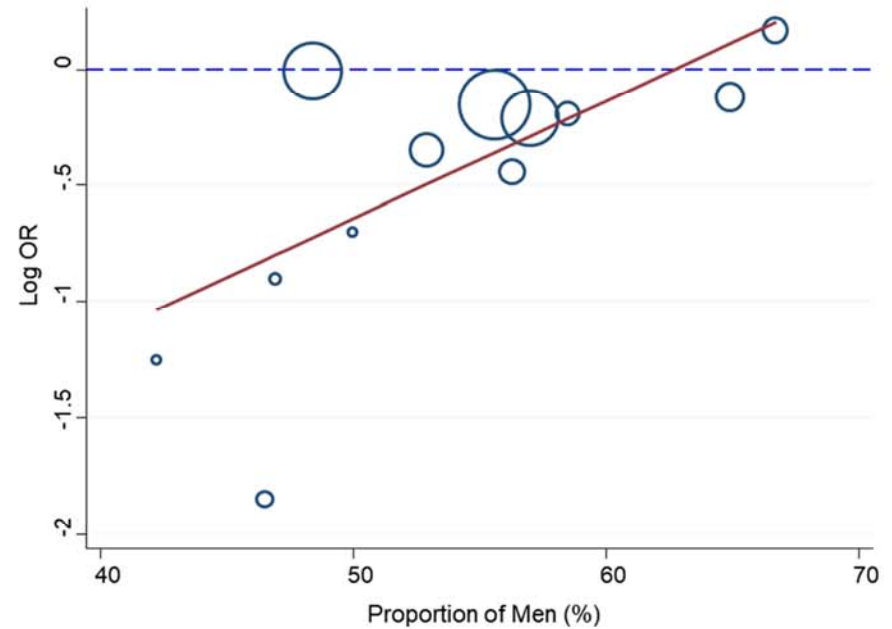

**$I^2$  residual = 80.75%, Adjusted  $R^2$  = 38.46%**  
**Odds Ratio 1.052, 95% CI (1.009 – 1.097), P = 0.023**

### eFigure 5. Association between sex and hearing recovery

Log values of odds ratios for (A) complete hearing recovery and (B) any hearing recovery are plotted according to the proportion of men of each enrolled study, using random-effects meta-regression. Each circle indicates a trial which was proportionately weighed in meta-analysis.

Abbreviations: CI, confidence interval.

## References

1. Fattori B, Berrettini S, Casani A, Nacci A, De Vito A, De Iaco G. Sudden hypoacusis treated with hyperbaric oxygen therapy: a controlled study. *Ear Nose Throat J*. 2001;80(9):655-660.
2. Cadoni G, Agostino S, Scipione S, et al. Sudden sensorineural hearing loss: our experience in diagnosis, treatment, and outcome. *J Otolaryngol*. 2005;34(6):395-401.
3. Callioğlu EE, Tuzuner A, Demirci S, Cengiz C, Caylan R. Comparison of simultaneous systemic steroid and hyperbaric oxygen treatment versus only steroid in idiopathic sudden sensorineural hearing loss. *International Journal of Clinical and Experimental Medicine*. 2015;8(6):9876-9882.
4. Ajduk J, Ries M, Trotic R, Marinac I, Vlatka K, Bedekovic V. Hyperbaric Oxygen Therapy as Salvage Therapy for Sudden Sensorineural Hearing Loss. *J Int Adv Otol*. 2017;13(1):61-64.
5. Ergun Tasdoven G, Derin AT, Yaprak N, Ozcaglar HU. The place of hyperbaric oxygen therapy and ozone therapy in sudden hearing loss. *Braz J Otorhinolaryngol*. 2017;83(4):457-463.
6. Topuz E, Yigit O, Cinar U, Seven H. Should hyperbaric oxygen be added to treatment in idiopathic sudden sensorineural hearing loss? *Eur Arch Otorhinolaryngol*. 2004;261(7):393-396.
7. Cekin E, Cincik H, Ulubil SA, Gungor A. Effectiveness of hyperbaric oxygen therapy in management of sudden hearing loss. *J Laryngol Otol*. 2009;123(6):609-612.

8. Cvorovic L, Jovanovic MB, Milutinovic Z, Arsovic N, Djeric D. Randomized prospective trial of hyperbaric oxygen therapy and intratympanic steroid injection as salvage treatment of sudden sensorineural hearing loss. *Otol Neurotol*. 2013;34(6):1021-1026.
9. Cavallazzi G, Pignataro L, Capaccio P, editors. Italian experience in hyperbaric oxygen therapy for idiopathic sudden sensorineural hearing loss. International Joint Meeting on Hyperbaric and Underwater Medicine; 1996.
10. Aslan I, Oysu C, Veyseller B, Baserer N. Does the addition of hyperbaric oxygen therapy to the conventional treatment modalities influence the outcome of sudden deafness? *Otolaryngology-Head and Neck Surgery*. 2002;126(2):121-126.
11. Narozny W, Kuczkowski J, Kot J, Stankiewicz C, Sicko Z, Mikaszewski B. Prognostic factors in sudden sensorineural hearing loss: our experience and a review of the literature. *Ann Otol Rhinol Laryngol*. 2006;115(7):553-558.
12. Desloovere C, Knecht R, Germonpre P. Hyperbaric oxygen therapy after failure of conventional therapy for sudden deafness. *B-ent*. 2006;2(2):69-73.
13. Satar B, Hidir Y, Yetiser S. Effectiveness of hyperbaric oxygen therapy in idiopathic sudden hearing loss. *J Laryngol Otol*. 2006;120(8):665-669.
14. Dundar K, Gumus T, Ay H, Yetiser S, Ertugrul E. Effectiveness of hyperbaric oxygen on sudden sensorineural hearing loss: prospective clinical research. *J Otolaryngol*. 2007;36(1):32-37.
15. Fujimura T, Suzuki H, Shiomori T, Udaka T, Mori T. Hyperbaric oxygen and steroid therapy for idiopathic sudden sensorineural hearing loss. *Eur Arch Otorhinolaryngol*. 2007;264(8):861-866.

16. Ohno K, Noguchi Y, Kawashima Y, Yagishita K, Kitamura K. Secondary hyperbaric oxygen therapy for idiopathic sudden sensorineural hearing loss in the subacute and chronic phases. *J Med Dent Sci.* 2010;57(2):127-132.
17. Alimoglu Y, Inci E, Edizer DT, Ozdilek A, Aslan M. Efficacy comparison of oral steroid, intratympanic steroid, hyperbaric oxygen and oral steroid + hyperbaric oxygen treatments in idiopathic sudden sensorineural hearing loss cases. *Eur Arch Otorhinolaryngol.* 2011;268(12):1735-1741.
18. Liu SC, Kang BH, Lee JC, et al. Comparison of therapeutic results in sudden sensorineural hearing loss with/without additional hyperbaric oxygen therapy: a retrospective review of 465 audiological controlled cases. *Clin Otolaryngol.* 2011;36(2):121-128.
19. Yang CH, Wu RW, Hwang CF. Comparison of intratympanic steroid injection, hyperbaric oxygen and combination therapy in refractory sudden sensorineural hearing loss. *Otol Neurotol.* 2013;34(8):1411-1416.
20. Capuano L, Cavaliere M, Parente G, et al. Hyperbaric oxygen for idiopathic sudden hearing loss: is the routine application helpful? *Acta Otolaryngol.* 2015;135(7):692-697.
21. Pezzoli M, Magnano M, Maffi L, et al. Hyperbaric oxygen therapy as salvage treatment for sudden sensorineural hearing loss: a prospective controlled study. *Eur Arch Otorhinolaryngol.* 2015;272(7):1659-1666.
22. Psillas G, Ouzounidou S, Stefanidou S, et al. Hyperbaric oxygen as salvage treatment for idiopathic sudden sensorineural hearing loss. *B-ent.* 2015;11(1):39-44.
23. Hosokawa S, Sugiyama KI, Takahashi G, et al. Hyperbaric Oxygen Therapy as Adjuvant Treatment for Idiopathic Sudden Sensorineural Hearing Loss after Failure of Systemic Steroids. *Audiol Neurootol.* 2017;22(1):9-14.

24. Ricciardiello F, Abate T, Pianese A, et al. Sudden sensorineural hearing loss: role of hyperbaric oxygen therapy. *Translational Medicine Reports*. 2017;1(1).
